# Supplementary material
Source: HighWire-hosted journal article supplement (http://www.jrheum.org/highwire/filestream/29750/field_highwire_adjunct_files/0/150525DataSuppl.pdf)
Supplement: 150525DataSuppl.pdf [file 150525DataSuppl.pdf]

**ONLINE SUPPLEMENTARY DATA**

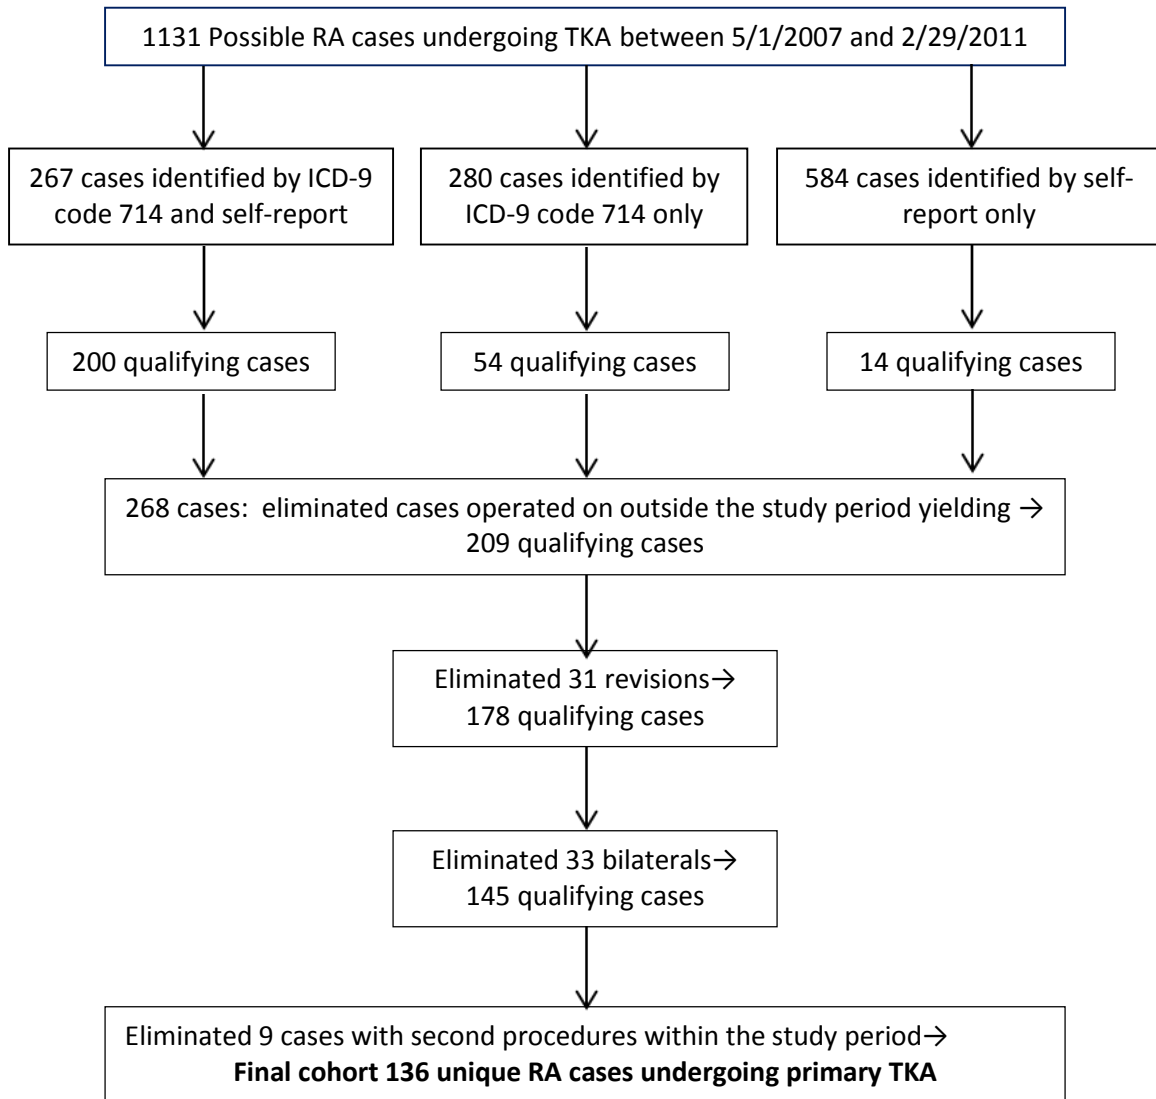

*Supplementary Figure 1.* Flow diagram demonstrating the case selection process from 1131 cases identified as RA by ICD-9 code 714 or self-report, and validated as RA by pre-established criteria.

| <i>Supplementary Table 1. Satisfaction at 2 years</i>                           |               |              |         |
|---------------------------------------------------------------------------------|---------------|--------------|---------|
|                                                                                 | OA (n = 4320) | RA (n = 136) | P value |
| Satisfaction at 2 years, Relieving Pain, n (%)                                  |               |              | 0.8861  |
| Very Satisfied                                                                  | 2247 (77%)    | 59 (81%)     |         |
| Somewhat Satisfied                                                              | 388 (13%)     | 7 (10%)      |         |
| Neither Satisfied nor Dissatisfied                                              | 59 (2%)       | 1 (1%)       |         |
| Somewhat Dissatisfied                                                           | 111 (4%)      | 3 (4%)       |         |
| Very Dissatisfied                                                               | 100 (3%)      | 3 (4%)       |         |
| Satisfaction at 2 years, Improving ability to do recreational activities, n (%) |               |              | 0.4399  |
| Very Satisfied                                                                  | 1668 (58%)    | 38 (54%)     |         |
| Somewhat Satisfied                                                              | 691 (24%)     | 14 (20%)     |         |
| Neither Satisfied nor Dissatisfied                                              | 203 (7%)      | 7 (10%)      |         |
| Somewhat Dissatisfied                                                           | 171 (6%)      | 6 (8%)       |         |
| Very Dissatisfied                                                               | 147 (5%)      | 6 (8%)       |         |
| Satisfaction at 2 years, Overall, n (%)                                         |               |              | 0.7833  |
| Very Satisfied                                                                  | 2158 (74%)    | 53 (72%)     |         |
| Somewhat Satisfied                                                              | 425 (15%)     | 10 (14%)     |         |
| Neither Satisfied nor Dissatisfied                                              | 62 (2%)       | 2 (3%)       |         |
| Dissatisfied                                                                    | 139 (5%)      | 5 (7%)       |         |
| Very Dissatisfied                                                               | 130 (4%)      | 4 (5%)       |         |
| Satisfaction at 2 years, Improving Quality of Life, n (%)                       |               |              | 0.2444  |
| More improvement than I ever dreamed possible                                   | 532 (18%)     | 20 (28%)     |         |
| Great improvement                                                               | 1679 (57%)    | 33 (46%)     |         |
| Moderate improvement                                                            | 432 (15%)     | 12 (17%)     |         |
| A little improvement                                                            | 143 (5%)      | 4 (6%)       |         |
| No improvement                                                                  | 69 (2%)       | 1 (1%)       |         |
| The quality of my life is worse                                                 | 67 (2%)       | 2 (3%)       |         |

*Supplementary Table 2. Univariate Analysis for Poor Pain or Function (WOMAC>40) Two Years After Surgery\**

|                                                | WOMAC Pain at 2 years<br>Estimated Coefficient<br>(Standard Error) | WOMAC Function at 2 years<br>Estimated Coefficient<br>(Standard Error) |
|------------------------------------------------|--------------------------------------------------------------------|------------------------------------------------------------------------|
| Age                                            | 0.98 (0.97, 1.01)***                                               | 1.00 (0.99, 1.02)***                                                   |
| Female vs. Male                                | <b>1.78 (1.22, 2.60)**</b>                                         | <b>1.90 (1.36, 2.67)**</b>                                             |
| RA vs. OA                                      | 1.61 (0.63, 4.14)***                                               | 1.73 (0.77, 3.91)***                                                   |
| ASA Class 2 vs. ASA Class 1                    | 0.88 (0.37, 2.07)                                                  | 1.37 (0.54, 3.44)                                                      |
| ASA Class 3+ vs. ASA Class 1                   | 1.09 (0.44, 2.68)                                                  | 2.05 (0.79, 5.30)                                                      |
| ≥1 Deyo Comorbidities vs. 0 Deyo Comorbidities | 1.08 (0.74, 1.58)                                                  | 1.33 (0.96, 1.84)                                                      |
| BMI                                            | 1.00 (0.97, 1.03)                                                  | 1.01 (0.99, 1.04)                                                      |
| ≥College education vs. <College                | <b>0.53 (0.38, 0.75)**</b>                                         | <b>0.45 (0.33, 0.62)**</b>                                             |
| Caucasian vs. Non-Caucasian                    | <b>0.48 (0.30, 0.77)**</b>                                         | <b>0.46 (0.31, 0.70)**</b>                                             |
| Pre-Op WOMAC Pain                              | <b>1.04 (1.03, 1.05)**</b>                                         | <b>1.04 (1.03, 1.05)**</b>                                             |
| Pre-Op WOMAC Function                          | <b>1.04 (1.02, 1.05)**</b>                                         | <b>1.04 (1.03, 1.06)**</b>                                             |
| Pre-Op PCS                                     | <b>0.94 (0.92, 0.96)**</b>                                         | <b>0.94 (0.92, 0.96)**</b>                                             |
| Pre-Op MCS                                     | <b>0.96 (0.95, 0.97)**</b>                                         | <b>0.95 (0.94, 0.96)**</b>                                             |
| Previous Replacement vs. No Prev Replacement   | 1.18 (0.79, 1.77)                                                  | 1.19 (0.83, 1.71)                                                      |
| Back Pain vs. No Back Pain                     | <b>1.49 (1.05, 2.11)**</b>                                         | <b>1.87 (1.37, 2.55)**</b>                                             |
| Expectation Score                              | 1.00 (0.99, 1.01)                                                  | 0.99 (0.98, 1.01)                                                      |

\* Univariate logistic regression controlling for each individual predictor as listed in the table

\*\* Variables with p-value<0.05 in the univariate analysis and included in the multivariate regression

\*\*\*Variables with p-value>0.05 in the univariate analysis; included in the multivariate regression based on the research of interest

*Supplementary Table 3. Predictors of Having Poor Pain or Function (WOMAC  $\leq$ 60) Two Years After Surgery\**

|                                                      | Poor WOMAC Pain at 2 years<br>(WOMAC $\leq$ 60)<br>Odds Ratio<br>(95% CI) | Poor WOMAC Function<br>at 2 years<br>(WOMAC $\leq$ 60)<br>Odds Ratio<br>(95% CI) |
|------------------------------------------------------|---------------------------------------------------------------------------|----------------------------------------------------------------------------------|
| Age                                                  | **                                                                        | **                                                                               |
| Female vs. Male                                      | <b>1.59 (1.02, 2.46)</b>                                                  | <b>2.01 (1.19, 3.41)</b>                                                         |
| RA vs. OA                                            | 0.66 (0.22, 2.05)***                                                      | 0.67 (0.18, 2.50)***                                                             |
| ASA Class 2 vs. ASA Class 1                          | **                                                                        | **                                                                               |
| ASA Class 3+ vs. ASA Class 1                         | **                                                                        | **                                                                               |
| $\geq$ 1 Deyo Comorbidities vs. 0 Deyo Comorbidities | **                                                                        | 1.05 (0.65, 1.69)                                                                |
| BMI                                                  | **                                                                        | **                                                                               |
| $\geq$ College education vs. <College                | 0.85 (0.58, 1.25)                                                         | 0.66 (0.42, 1.03)                                                                |
| Caucasian vs. Non-Caucasian                          | <b>0.51 (0.31, 0.84)</b>                                                  | 0.59 (0.33, 1.05)                                                                |
| Pre-Op WOMAC Pain                                    | <b>0.97 (0.96, 0.99)</b>                                                  | 1.00 (0.98, 1.02)                                                                |
| Pre-Op WOMAC Function                                | 1.01 (0.99, 1.03)                                                         | 0.98 (0.96, 1.01)                                                                |
| Pre-Op PCS                                           | <b>0.96 (0.93, 0.99)</b>                                                  | 0.98 (0.94, 1.02)                                                                |
| Pre-Op MCS                                           | <b>0.98 (0.96, 0.99)</b>                                                  | <b>0.98 (0.96, 0.99)</b>                                                         |
| Previous Replacement vs. No Prev Replacement         | **                                                                        | **                                                                               |
| Back Pain vs. No Back Pain                           | 1.27 (0.86, 1.88)                                                         | 1.34 (0.86, 2.11)                                                                |
| Expectation Score                                    | **                                                                        | 0.99 (0.98, 1.01)                                                                |

\*Multivariate logistic regression controlling for age, gender, diagnosis, ASA class, deyo comorbidities, BMI, education, race, pre-operative WOMAC pain score, pre-operative WOMAC function score, pre-operative PCS, pre-operative MCS, previous replacement, back pain, and expectation score.

\*\* Variable excluded if they had a p-value greater than 0.1 in the univariate analysis.

\*\*\*RA was included in the analysis based on the research interest. It was not significant in the univariate analysis.
